# Supplementary material for: Efficacy and Safety of Self-Titration Algorithms of Insulin Glargine 300 units/mL in Individuals with Uncontrolled Type 2 Diabetes Mellitus (The Korean TITRATION Study): A Randomized Controlled Trial
Source: PubMed Central journal article supplement — Diabetes Metab J. 2021 Jun 16;46(1):71–80. doi: 10.4093/dmj.2020.0274 (PMC8831820; doi:10.4093/dmj.2020.0274), 2021-06-16
Supplement: dmj-2020-0274-suppl1.pdf [file dmj-2020-0274-suppl1.pdf]

**Supplementary Table 1.** Insulin dose titration algorithms

| Group 1 (INSIGHT algorithm)                                                                                                                                                                                                                                                                                                                                                                                                                                                                                                                                                                                                                                                                                                                                                                                                                                                                                                                                                 |
|-----------------------------------------------------------------------------------------------------------------------------------------------------------------------------------------------------------------------------------------------------------------------------------------------------------------------------------------------------------------------------------------------------------------------------------------------------------------------------------------------------------------------------------------------------------------------------------------------------------------------------------------------------------------------------------------------------------------------------------------------------------------------------------------------------------------------------------------------------------------------------------------------------------------------------------------------------------------------------|
| <ul style="list-style-type: none"> <li>• Patients are instructed to adjust the dose of insulin glargine 300 units/mL (Gla-300) by 1 unit per day until achieving a fasting self-monitoring of blood glucose (SMBG) in the range of 4.4–5.6 mmol/L.</li> <li>• When fasting SMBG values are in the range of               <ol style="list-style-type: none"> <li>1. &gt;5.6 mmol/L, increase 1 unit of Gla-300 dose</li> <li>2. <math>\geq 4.4</math> and <math>\leq 5.6</math> mmol/L, no change</li> <li>3. &lt;4.4 mmol/L, decrease 1 unit of Gla-300 dose</li> </ol> </li> </ul>                                                                                                                                                                                                                                                                                                                                                                                         |
| Group 2 (EDITION algorithm)                                                                                                                                                                                                                                                                                                                                                                                                                                                                                                                                                                                                                                                                                                                                                                                                                                                                                                                                                 |
| <ul style="list-style-type: none"> <li>• Patients are instructed to adjust the dose of Gla-300 once weekly based on the median SMBG values of the last 3 days (including the current day) but no more than every 3 days to achieve a fasting SMBG in the range of 4.4–5.6 mmol/L.</li> <li>• When fasting SMBG values are in the range of               <ol style="list-style-type: none"> <li>1. <math>\geq 7.8</math> mmol/L, increase 6 units of Gla-300 dose</li> <li>2. &gt;5.6 and &lt;7.8 mmol/L, increase 3 units of Gla-300 dose</li> <li>3. <math>\geq 4.4</math> and <math>\leq 5.6</math> mmol/L, no change</li> <li>4. <math>\geq 3.3</math> and &lt;4.4 mmol/L, decrease 3 units of Gla-300 dose</li> <li>5. &lt;3.3 mmol/L, or the occurrence of <math>\geq 2</math> symptomatic or <math>\geq 1</math> severe hypoglycemic episodes in the preceding week, decrease 3 units of Gla-300 dose or at the discretion of the investigator</li> </ol> </li> </ul> |
| Both groups (INSIGHT and EDITION algorithms)                                                                                                                                                                                                                                                                                                                                                                                                                                                                                                                                                                                                                                                                                                                                                                                                                                                                                                                                |
| <ul style="list-style-type: none"> <li>• Participants are allowed to contact the study site if they have any episodes of hypoglycemia or want to discuss insulin dose adjustments between scheduled visits.</li> </ul>                                                                                                                                                                                                                                                                                                                                                                                                                                                                                                                                                                                                                                                                                                                                                      |

INSIGHT, Implementing New Strategies with Insulin Glargine for Hyperglycemia Treatment.
