# Supplementary material for: Efficacy and Safety of Self-Titration Algorithms of Insulin Glargine 300 units/mL in Individuals with Uncontrolled Type 2 Diabetes Mellitus (The Korean TITRATION Study): A Randomized Controlled Trial
Source: PubMed Central journal article supplement — Diabetes Metab J. 2021 Jun 16;46(1):71–80. doi: 10.4093/dmj.2020.0274 (PMC8831820; doi:10.4093/dmj.2020.0274), 2021-06-16
Supplement: dmj-2020-0274-suppl3.pdf [file dmj-2020-0274-suppl3.pdf]

**Supplementary Table 3.** PRECIS-2 scores for nine domains

| Domain                                                                                                                                                                                  | Score | Rationale                                                                                                                                                                                             |
|-----------------------------------------------------------------------------------------------------------------------------------------------------------------------------------------|-------|-------------------------------------------------------------------------------------------------------------------------------------------------------------------------------------------------------|
| Eligibility—To what extent are the participants in the trial similar to those who would receive this intervention if it was part of usual care?                                         | 5     | We included patients with type 2 diabetes mellitus who required insulin therapy and who were willing to inject insulin or to use self-monitoring of blood glucose (SMBG) under usual care conditions. |
| Recruitment—How much extra effort is made to recruit participants over and above what would be used in the usual care setting to engage with patients?                                  | 4     | In routine clinical practice, the participants were recruited if they wanted to be engaged in the study during scheduled visits.                                                                      |
| Setting—How different are the settings of the trial from the usual care setting?                                                                                                        | 5     | The settings of the trial were not different from usual care except that the participants were recommended to adjust insulin doses according to assigned algorithms.                                  |
| Organization—How different are the resources, provider expertise, and the organization of care delivery in the intervention arm of the trial from those available in usual care?        | 5     | The number of healthcare providers or other professionals was not changed above the levels available in usual care.                                                                                   |
| Flexibility (delivery)—How different is the flexibility in how the intervention is delivered and the flexibility anticipated in usual care?                                             | 4     | The participants adjusted insulin doses by assigned algorithms that were similar to usual care.                                                                                                       |
| Flexibility (adherence)—How different is the flexibility in how participants are monitored and encouraged to adhere to the intervention from the flexibility anticipated in usual care? | 5     | The participants adjusted insulin doses based on fasting SMBG values. Fasting SMBG values were measured using participants' glucometers.                                                              |
| Follow-up—How different is the intensity of measurement and follow-up of participants in the trial from the typical follow-up in usual care?                                            | 5     | After the initial visit (at week 0), the participants were followed up at week 12 under usual care conditions.                                                                                        |
| Primary outcome—To what extent is the trial's primary outcome directly relevant to participants?                                                                                        | 5     | The primary outcome was directly relevant to the participants.                                                                                                                                        |
| Primary analysis—To what extent are all data included in the analysis of the primary outcome?                                                                                           | 5     | All analyses were conducted according to the intention-to-treat principle.                                                                                                                            |

Scoring each domain can be done using a 5-point Likert scale: 1, very explanatory; 2, rather explanatory; 3, equally pragmatic and explanatory; 4, rather pragmatic; 5, very pragmatic.

PRECIS-2, PRagmatic Explanatory Continuum Indicator Summary 2.
