# Supplementary material for: Efficacy and Safety of Self-Titration Algorithms of Insulin Glargine 300 units/mL in Individuals with Uncontrolled Type 2 Diabetes Mellitus (The Korean TITRATION Study): A Randomized Controlled Trial
Source: PubMed Central journal article supplement — Diabetes Metab J. 2021 Jun 16;46(1):71–80. doi: 10.4093/dmj.2020.0274 (PMC8831820; doi:10.4093/dmj.2020.0274), 2021-06-16
Supplement: dmj-2020-0274-suppl4.pdf [file dmj-2020-0274-suppl4.pdf]

**Supplementary Table 4.** CONSORT 2010 checklist

| Section/Topic                    | Item no. | Checklist item                                                                                                                                                                              | Reported on page no.        |
|----------------------------------|----------|---------------------------------------------------------------------------------------------------------------------------------------------------------------------------------------------|-----------------------------|
| Title and abstract               |          |                                                                                                                                                                                             |                             |
|                                  | 1a       | Identification as a randomized trial in the title                                                                                                                                           | 1                           |
|                                  | 1b       | Structured summary of trial design, methods, results, and conclusions (for specific guidance see CONSORT for abstracts)                                                                     | 3                           |
| Introduction                     |          |                                                                                                                                                                                             |                             |
| Background and objectives        | 2a       | Scientific background and explanation of rationale                                                                                                                                          | 4, 5                        |
|                                  | 2b       | Specific objectives or hypotheses                                                                                                                                                           | 5                           |
| Methods                          |          |                                                                                                                                                                                             |                             |
| Trial design                     | 3a       | Description of trial design (such as parallel and factorial), including allocation ratio                                                                                                    | 6, 7, Fig. 1                |
|                                  | 3b       | Important changes to methods after trial commencement (such as eligibility criteria), with reasons                                                                                          | 8                           |
| Participants                     | 4a       | Eligibility criteria for participants                                                                                                                                                       | 5, 6                        |
|                                  | 4b       | Settings and locations where the data were collected                                                                                                                                        | 6, 7                        |
| Interventions                    | 5        | The interventions for each group with sufficient details to allow replication, including how and when they were actually administered                                                       | 6, 7, Supplementary Table 1 |
| Outcomes                         | 6a       | Completely defined pre-specified primary and secondary outcome measures, including how and when they were assessed                                                                          | 7                           |
|                                  | 6b       | Any changes to trial outcomes after the trial commenced, with reasons                                                                                                                       | Not applicable              |
| Sample size                      | 7a       | How sample size was determined                                                                                                                                                              | 8                           |
|                                  | 7b       | When applicable, explanation of any interim analyses and stopping guidelines                                                                                                                | Not applicable              |
| Randomization:                   |          |                                                                                                                                                                                             |                             |
| Sequence generation              | 8a       | Method used to generate the random allocation sequence                                                                                                                                      | 6                           |
|                                  | 8b       | Type of randomization; details of any restriction (such as blocking and block size)                                                                                                         | 6                           |
| Allocation concealment mechanism | 9        | Mechanism used to implement the random allocation sequence (such as sequentially numbered containers), describing any steps taken to conceal the sequence until interventions were assigned | 6                           |
| Implementation                   | 10       | Who generated the random allocation sequence, who enrolled participants, and who assigned participants to interventions                                                                     | 6                           |
| Blinding                         | 11a      | If done, who was blinded after assignment to interventions (for example, participants, care providers, and those assessing outcomes) and how                                                | Not applicable              |
|                                  | 11b      | If relevant, description of the similarity of interventions                                                                                                                                 | 7, Supplementary Table 1    |
| Statistical methods              | 12a      | Statistical methods used to compare groups for primary and secondary outcomes                                                                                                               | 8                           |
|                                  | 12b      | Methods for additional analyses, such as subgroup analyses and adjusted analyses                                                                                                            | Not applicable              |

*(Continued to the next page)*

Supplementary Table 4. Continued

| Section/Topic                                        | Item no. | Checklist item                                                                                                                                    | Reported on page no. |
|------------------------------------------------------|----------|---------------------------------------------------------------------------------------------------------------------------------------------------|----------------------|
| <b>Results</b>                                       |          |                                                                                                                                                   |                      |
| Participant flow (a diagram is strongly recommended) | 13a      | For each group, the numbers of participants who were randomly assigned, received intended treatment, and were analyzed for the primary outcome    | 9, Fig. 1            |
|                                                      | 13b      | For each group, losses and exclusions after randomization, together with reasons                                                                  | 9, Fig. 1            |
| Recruitment                                          | 14a      | Dates defining the periods of recruitment and follow-up                                                                                           | Not reported         |
|                                                      | 14b      | Why the trial ended or was stopped                                                                                                                | Not applicable       |
| Baseline data                                        | 15       | A table showing baseline demographic and clinical characteristics for each group                                                                  | Table 1              |
| Numbers analyzed                                     | 16       | For each group, number of participants (denominator) included in each analysis and whether the analysis was by original assigned groups           | 9                    |
| Outcomes and estimation                              | 17a      | For each primary and secondary outcome, results for each group, and the estimated effect size and its precision (such as 95% confidence interval) | 9, 10                |
|                                                      | 17b      | For binary outcomes, presentation of both absolute and relative effect sizes is recommended                                                       | Not applicable       |
| Ancillary analyses                                   | 18       | Results of any other analyses performed, including subgroup analyses and adjusted analyses, distinguishing pre-specified from exploratory         | Not applicable       |
| Harms                                                | 19       | All important harms or unintended effects in each group (for specific guidance see CONSORT for harms)                                             | 10                   |
| <b>Discussion</b>                                    |          |                                                                                                                                                   |                      |
| Limitations                                          | 20       | Trial limitations, addressing sources of potential bias, imprecision, and, if relevant, multiplicity of analyses                                  | 14                   |
| Generalizability                                     | 21       | Generalizability (external validity and applicability) of the trial findings                                                                      | 10–14                |
| Interpretation                                       | 22       | Interpretation consistent with results, balancing benefits and harms, and considering other relevant evidence                                     | 10–14                |
| <b>Other information</b>                             |          |                                                                                                                                                   |                      |
| Registration                                         | 23       | Registration number and name of trial registry                                                                                                    | 3, 6                 |
| Protocol                                             | 24       | Where the full trial protocol can be accessed, if available                                                                                       | Not applicable       |
| Funding                                              | 25       | Sources of funding and other support (such as supply of drugs), role of funders                                                                   | 15                   |

Adapted from Schulz et al. [25].

CONSORT, Consolidated Standards of Reporting Trials.
